# Supplementary material for: Effects of Transcranial Electrical Stimulation on Gambling and Gaming: A Systematic Review of Studies on Healthy Controls, Participants with Gambling/Gaming Disorder, and Substance Use Disorder
Source: MDPI journal article supplement (doi:10.3390/jcm12103407), 2023-05-11
Supplement: s1 [file s1]

## S1. Search strategy syntax

### PubMed:

| Keywords and MeSh terms for Transcranial Electrical Stimulation |                                                                                                                                                                                                                                                                                                                                                                                |
|-----------------------------------------------------------------|--------------------------------------------------------------------------------------------------------------------------------------------------------------------------------------------------------------------------------------------------------------------------------------------------------------------------------------------------------------------------------|
| #1                                                              | "non-invasive brain stimulation"[Title/Abstract] OR "transcranial direct current stimulation"[Title/Abstract] OR "transcranial alternating current stimulation"[Title/Abstract] OR tdcS[Title/Abstract] OR tacs[Title/Abstract] OR neuromodulation[Title/Abstract] OR "transcranial electrical stimulation"[Title/Abstract] OR "Transcranial Direct Current Stimulation"[Mesh] |
| Keywords and MeSh terms for gambling and gaming behaviours      |                                                                                                                                                                                                                                                                                                                                                                                |
| #2                                                              | gambl*[Title/Abstract] OR "video game*" [Title/Abstract] OR gaming [Title/Abstract] OR "risk taking" [Title/Abstract] OR "decision making" [Title/Abstract] OR impulsivity[Title/Abstract] OR BART[Title/Abstract] OR "Behavior, Addictive"[Mesh] OR "Internet Addiction Disorder"[Mesh] OR "Technology Addiction"[Mesh] OR "Gambling"[Mesh]                                   |
| #3                                                              | #1 AND #2 NOT ("Animals"[Mesh] NOT "Humans"[Mesh])                                                                                                                                                                                                                                                                                                                             |

### Scopus:

TITLE-ABS("non-invasive brain stimulation" OR "transcranial direct current stimulation" OR "transcranial alternating current stimulation" OR tdcS OR tacs OR neuromodulation OR "transcranial electrical stimulation") AND TITLE-ABS(gambl\* OR "video game\*" OR gaming OR "risk taking" OR "decision making" OR impulsivity OR BART) AND (EXCLUDE (EXACTKEYWORD , "Animals" ) OR EXCLUDE ( EXACTKEYWORD , "Animal" ) OR EXCLUDE ( EXACTKEYWORD , "Animal Experiment" )) AND ( LIMIT-TO ( SRCTYPE , "j" ) )

### Web of Science:

(TS=( "non-invasive brain stimulation" OR "transcranial direct current stimulation" OR "transcranial alternating current stimulation" OR tdcS OR tacs OR neuromodulation OR "transcranial electrical stimulation" )) AND TS=(gambl\* OR "video game\*" OR gaming OR "risk taking" OR "decision making" OR impulsivity OR BART)

Refined by: Document type – articles, Research areas – Psychology or Neurosciences Neurology or Psychiatry or Behavioural Sciences or Substance abuse.

Link: <https://www.webofscience.com/wos/woscc/summary/112ba9dc-4a18-4375-84b3-a215760f1ce8-689f85e8/relevance/1>

## S2. Risk of Bias assessment for each of the included studies

|                             | Risk of bias domains |    |    |    |    |         |
|-----------------------------|----------------------|----|----|----|----|---------|
|                             | D1                   | D2 | D3 | D4 | D5 | Overall |
| Giimore et al. 2018         | -                    | -  | +  | +  | +  | -       |
| Guo et al. 2018             | -                    | -  | +  | +  | +  | -       |
| Soyata et al. 2018          | +                    | +  | +  | +  | +  | +       |
| Patel et al. 2022           | -                    | +  | +  | -  | +  | -       |
| Boggio et al. 2010a         | -                    | -  | +  | ✗  | -  | ✗       |
| Fecteau et al. 2007a        | -                    | +  | +  | +  | +  | -       |
| Boggio et al. 2010b         | -                    | +  | +  | +  | +  | -       |
| Weber et al. 2014           | ✗                    | +  | +  | +  | +  | ✗       |
| Oulett et al. 2015          | -                    | +  | +  | +  | +  | -       |
| Russo et al. 2017           | -                    | +  | +  | +  | +  | -       |
| Yaple et al. 2017           | ✗                    | -  | +  | +  | +  | ✗       |
| Fecteau et al. 2007b        | -                    | ✗  | +  | -  | +  | ✗       |
| Ye et al. 2015a             | -                    | +  | +  | +  | -  | -       |
| Xiong et al. 2021           | -                    | +  | +  | +  | -  | -       |
| Sela et al. 2021            | -                    | +  | +  | +  | +  | -       |
| Minati et al. 2012          | -                    | +  | +  | +  | -  | -       |
| Jeong et al. 2020           | -                    | -  | +  | +  | +  | -       |
| Ye et al. 2015b             | -                    | +  | +  | +  | -  | -       |
| Yang et al. 2017            | -                    | +  | +  | +  | -  | -       |
| Huang et al. 2017           | -                    | +  | +  | +  | -  | -       |
| Verveer et al. 2020         | -                    | ✗  | ✗  | +  | +  | ✗       |
| He et al. 2016.             | -                    | +  | +  | +  | -  | -       |
| Martinotti et al. 2019      | -                    | +  | +  | +  | -  | -       |
| Alizadehgoradel et al. 2020 | +                    | -  | +  | +  | +  | -       |
| Ye et al. 2016              | -                    | +  | +  | +  | -  | -       |
| Leon et al. 2020            | -                    | +  | +  | +  | -  | -       |
| Wang et al 2017.            | ✗                    | +  | +  | +  | -  | ✗       |
| Lee et al. 2021             | +                    | +  | +  | +  | +  | +       |
| Wischnewski et al. 2016     | -                    | -  | +  | +  | -  | -       |
| Wischnewski et al. 2020     | -                    | +  | +  | +  | -  | -       |
| Cheng et al. 2016           | -                    | +  | +  | +  | -  | ✗       |
| Wischnewski et al. 2022     | ✗                    | +  | +  | +  | -  | ✗       |
| Pripfl et al. 2013          | -                    | +  | +  | +  | +  | -       |
| Gorini et al. 2014          | -                    | +  | +  | +  | -  | -       |
| Dantas et al. 2021          | -                    | +  | +  | +  | -  | -       |
| Fecteau et al. 2014         | -                    | +  | +  | +  | -  | -       |
| Nejati et al. 2018          | -                    | +  | +  | +  | +  | -       |
| Mattavelli et al. 2022      | -                    | +  | +  | +  | -  | -       |
| Wu et al. 2021              | +                    | +  | +  | +  | +  | +       |
| Wu et al. 2020              | +                    | +  | +  | +  | +  | +       |

Study

Domains:  
D1: Bias arising from the randomization process.  
D2: Bias due to deviations from intended intervention.  
D3: Bias due to missing outcome data.  
D4: Bias in measurement of the outcome.  
D5: Bias in selection of the reported result.

Judgement  
✗ High  
- Some concerns  
+ Low

The image was generated using Robvis visualization tool
